# Supplementary material for: Impregnation of ZnO onto a Vegetal Activated Carbon from Algerian Olive Waste: A Sustainable Photocatalyst for Degradation of Ethyl Violet Dye
Source: Hindawi journal article supplement (doi:10.1155/2019/4714107), 2019-02-25
Supplement: f1 [file 4714107.f1.pdf]

## Supporting Information

### Impregnation of ZnO onto a Vegetal Activated Carbon from Algerian olive waste: A sustainable photocatalyst for degradation of Ethyl-Violet dye

*Ala Abdessemed<sup>a,b</sup>, Shivatharsiny Rasalingam<sup>c,\*</sup>, Sanna Abdessemed<sup>a</sup>, Djebbar Kamel El Zin<sup>b</sup> and Ranjit Koodali<sup>d</sup>*

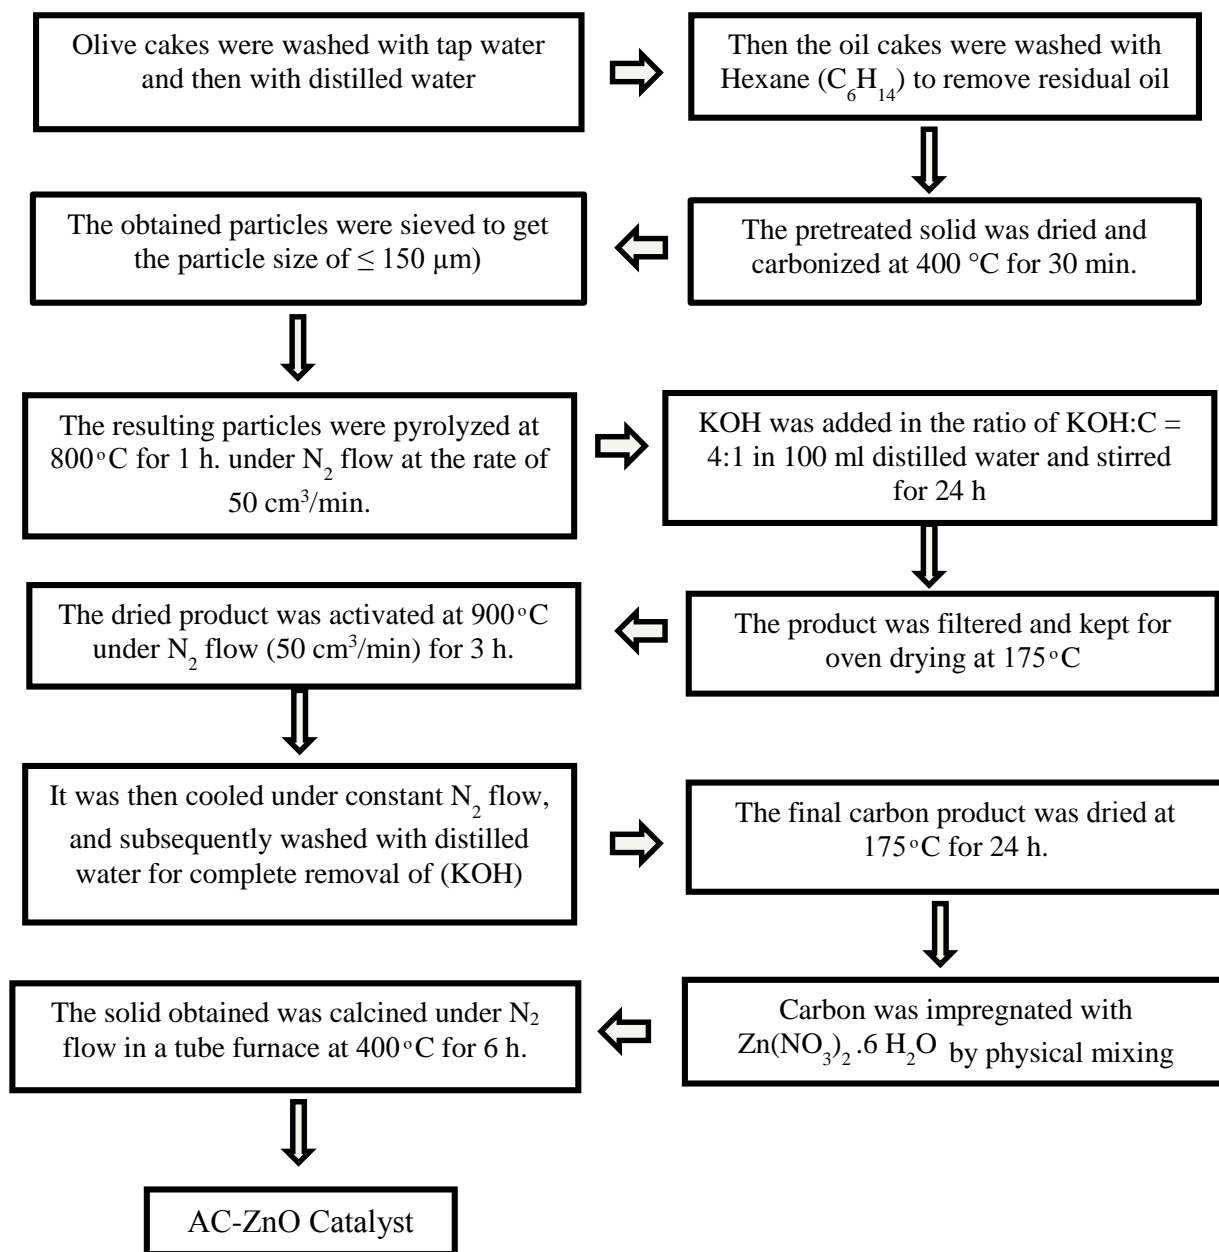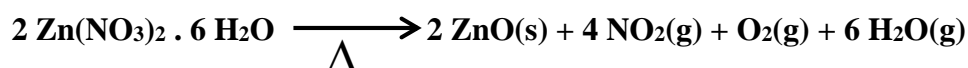

**Scheme S1.** Different steps involved in the preparation of the catalyst, AC-ZnO.

**Table S1.** Optimal instrumental conditions for ESI-MS studies.

| Parameters                  | Optimal values/conditions |
|-----------------------------|---------------------------|
| Infusion rate               | 10 $\mu\text{Lmin}^{-1}$  |
| Spray Shield voltage        | 600 V                     |
| Mode                        | Positive                  |
| Mass range ( $m/z$ ) 50-500 | 50-500                    |
| Capillary voltage 80 V      | 80 V                      |
| Drying gas temperature      | 400 $^{\circ}\text{C}$    |
| Nébuliser pressure          | 10 psi                    |
| Needle voltage              | 5000 V                    |
| Detector                    | Dynode ion detector       |
| Electron multiplier voltage | 1360 V                    |

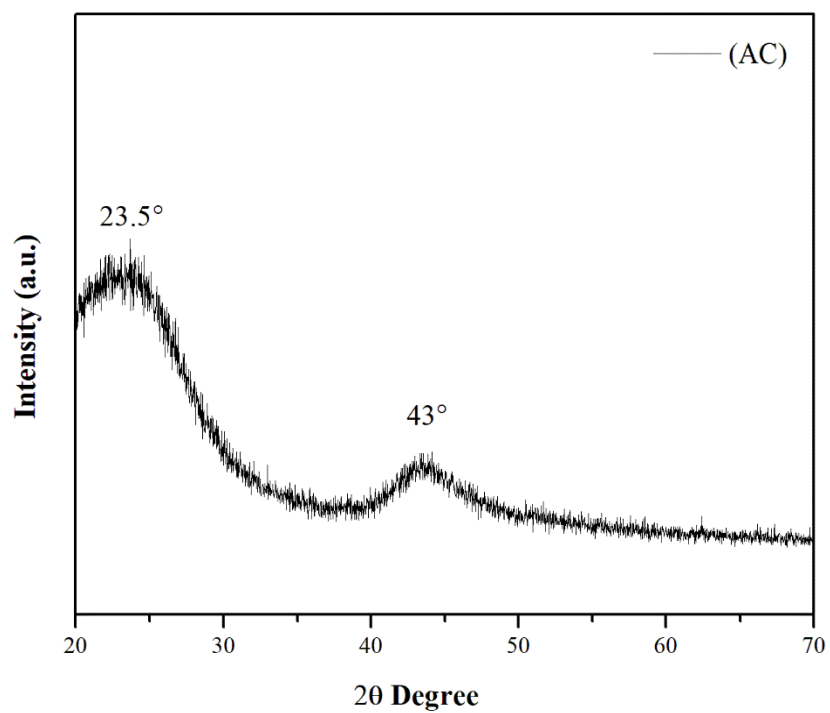

**Figure S1.** Powder X-ray diffraction patterns of blank activated carbon (AC).

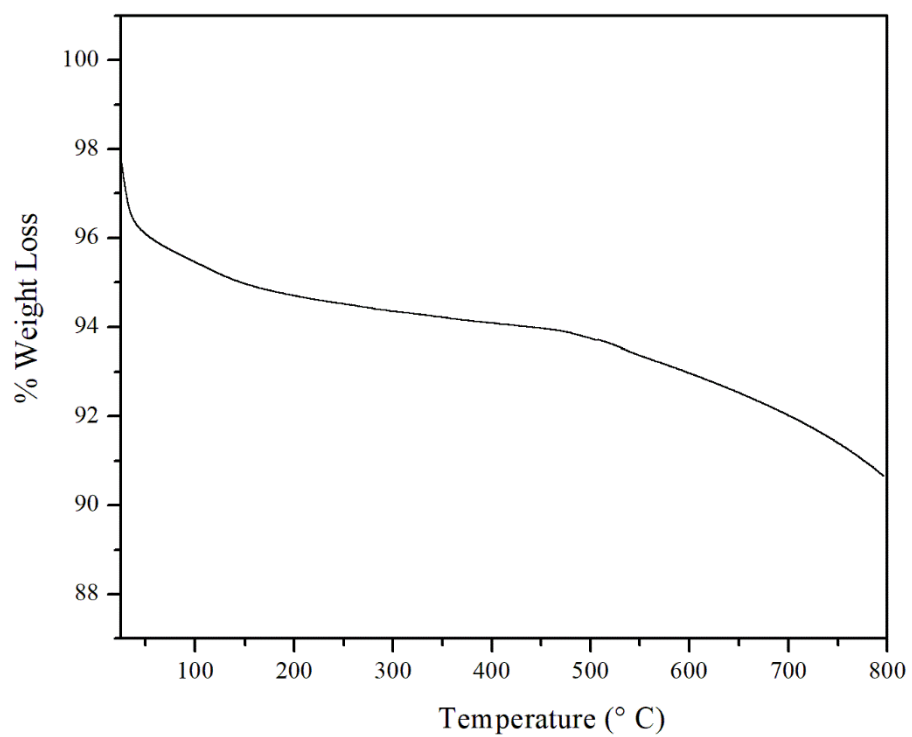

**Figure S2.** TGA of blank activated carbon (AC).

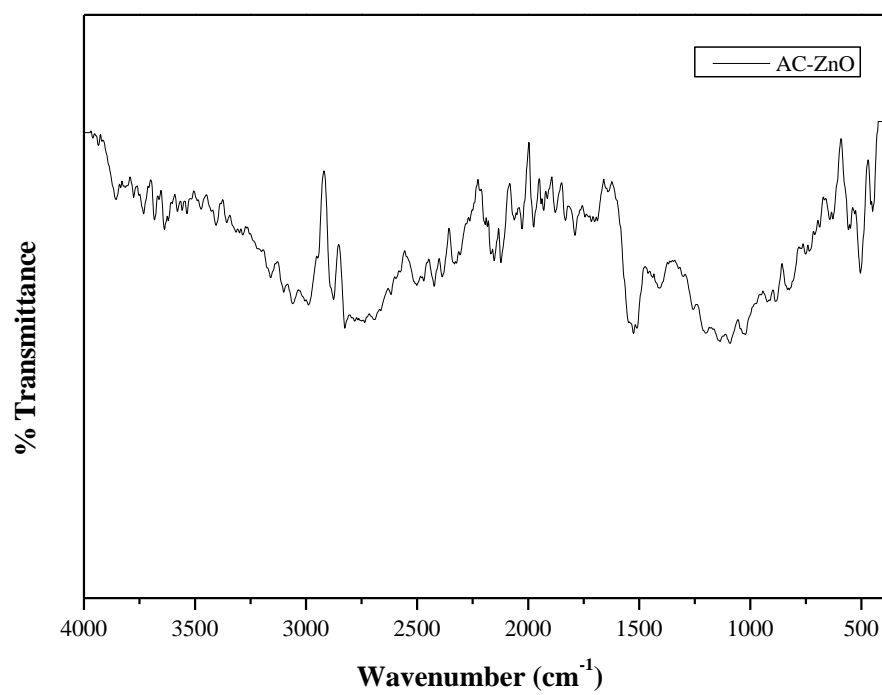

**Figure S3.** FT-IR spectrum of AC-ZnO.

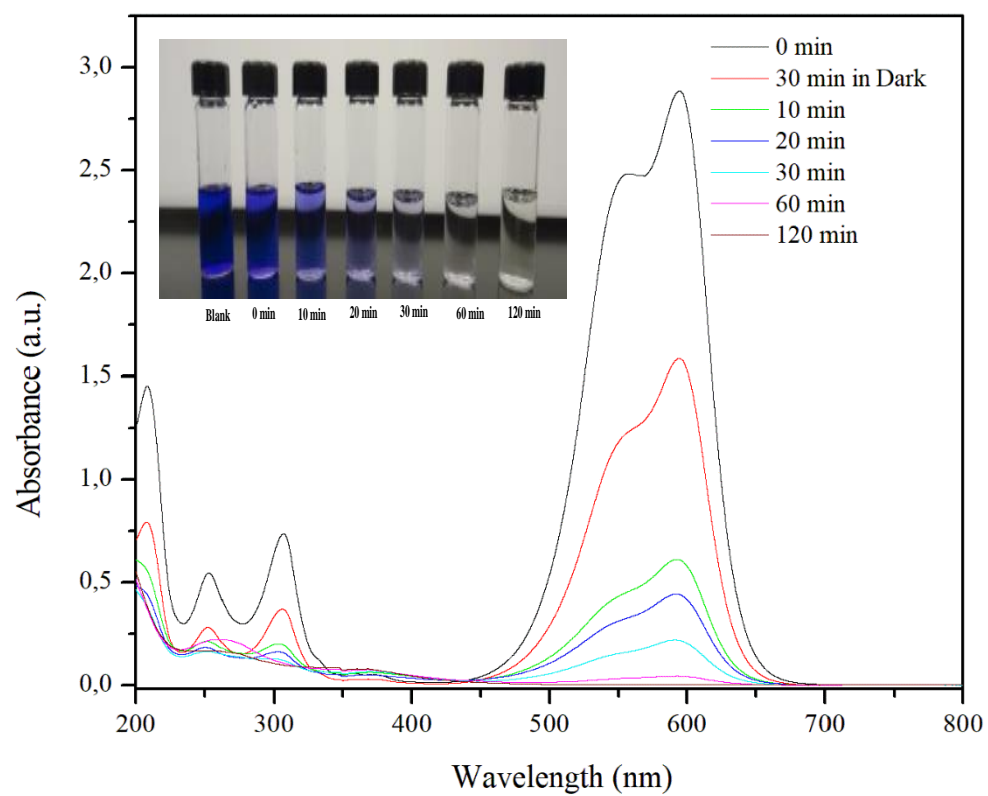

**Figure S4.** Absorption spectra of EV dye (after filtration) at various time intervals during UV light irradiation for 120 min. using AC-ZnO.

### (A) Blank - EV

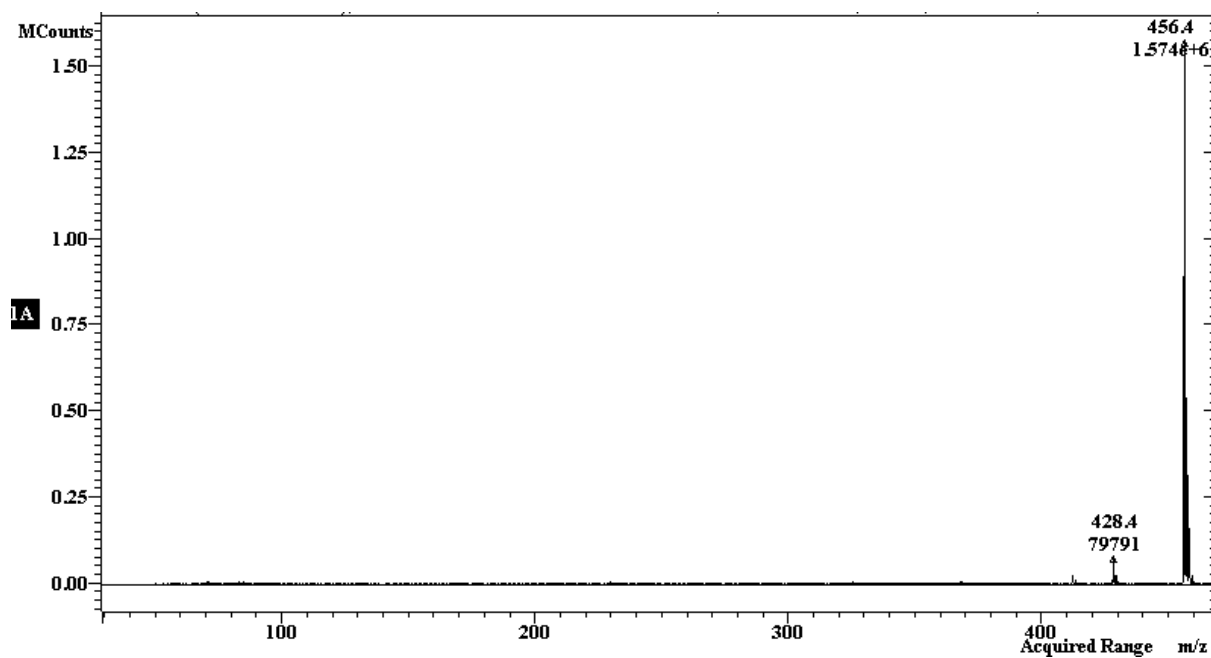

### (B) Dark - EV

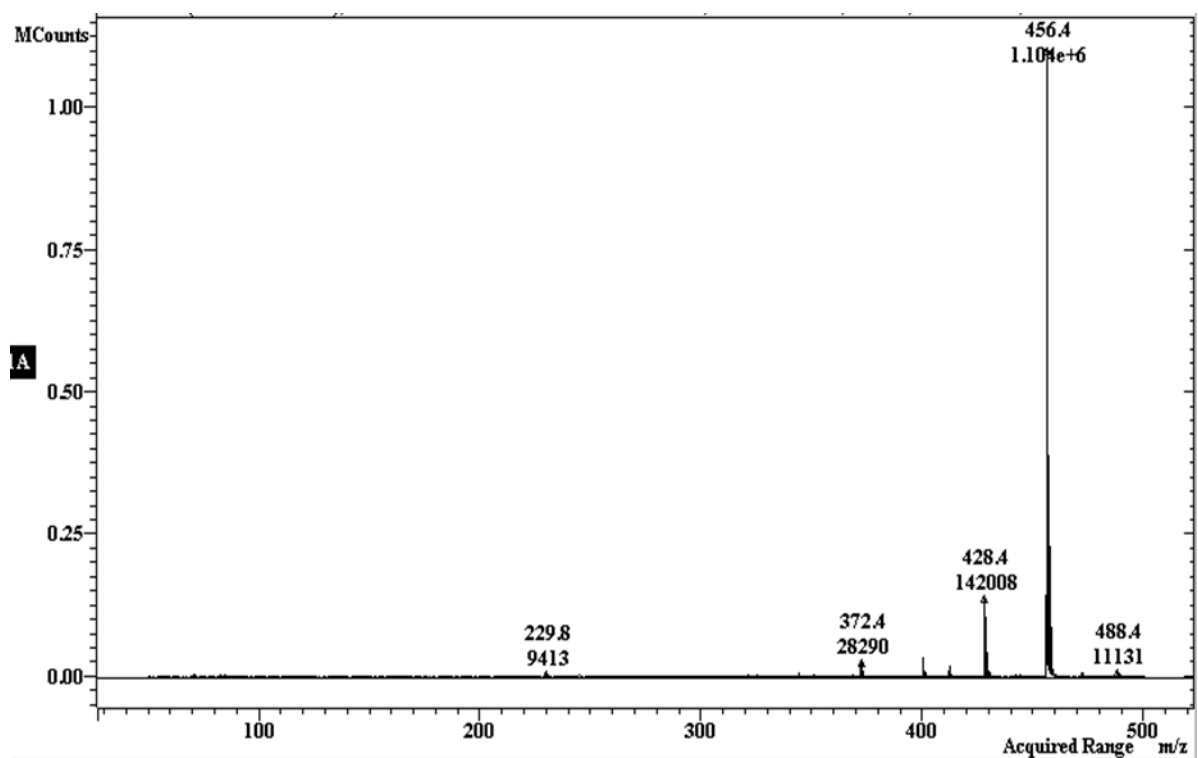

(C) 10 min. (EV)

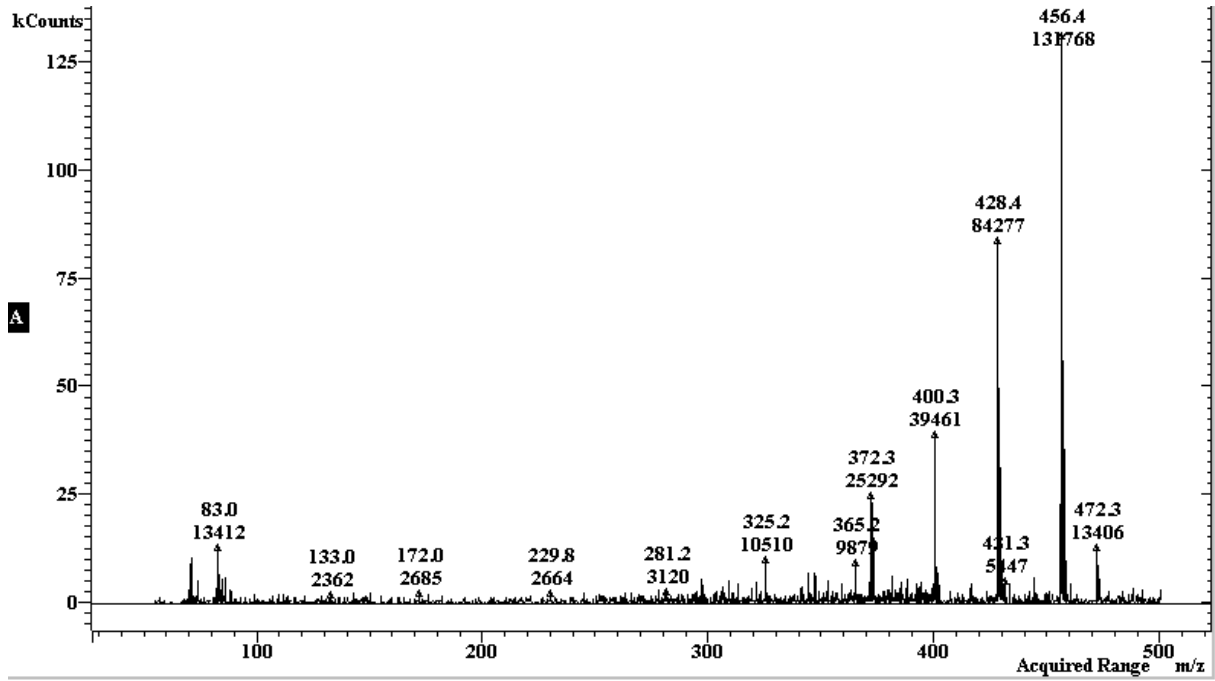

(D) 20 min. (EV)

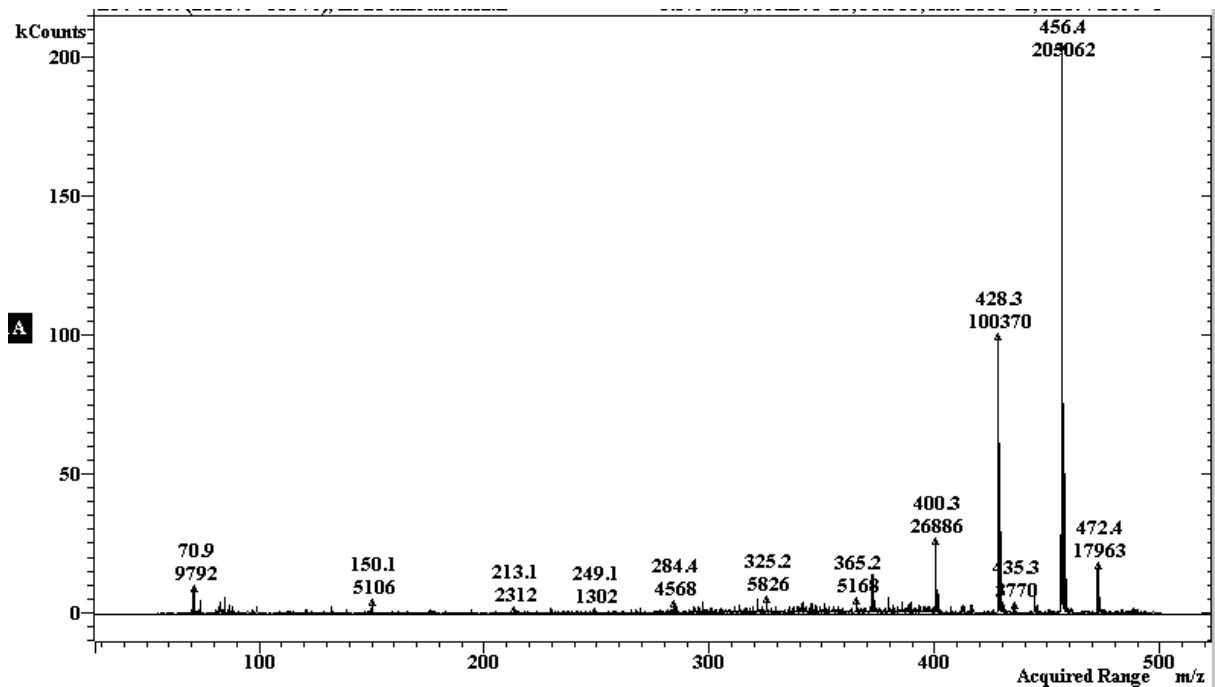



(E) 30 min. (EV)

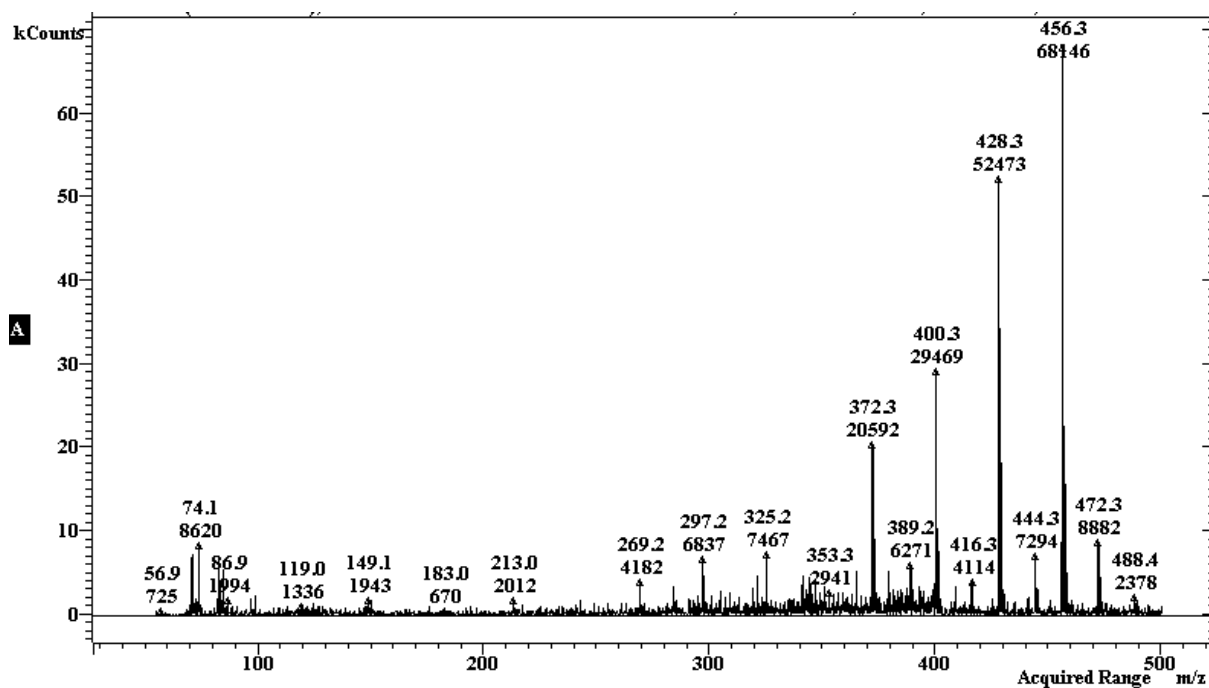

(F) 60 min. (EV)

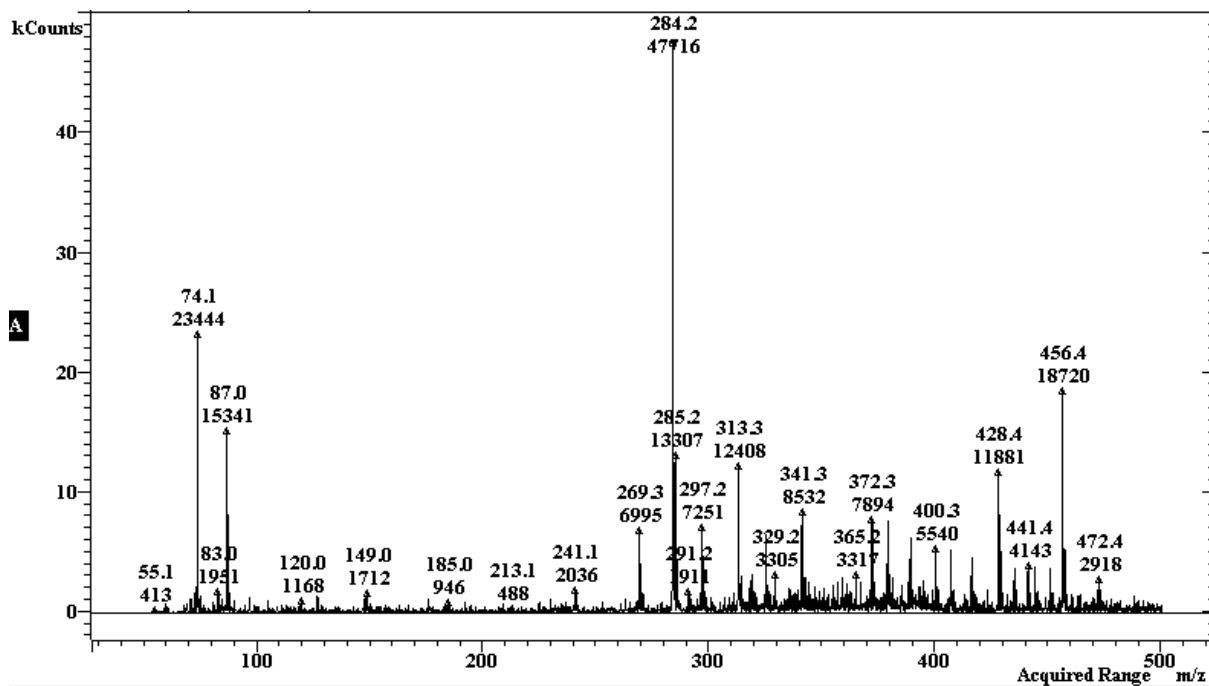

(G)120 min. (EV)

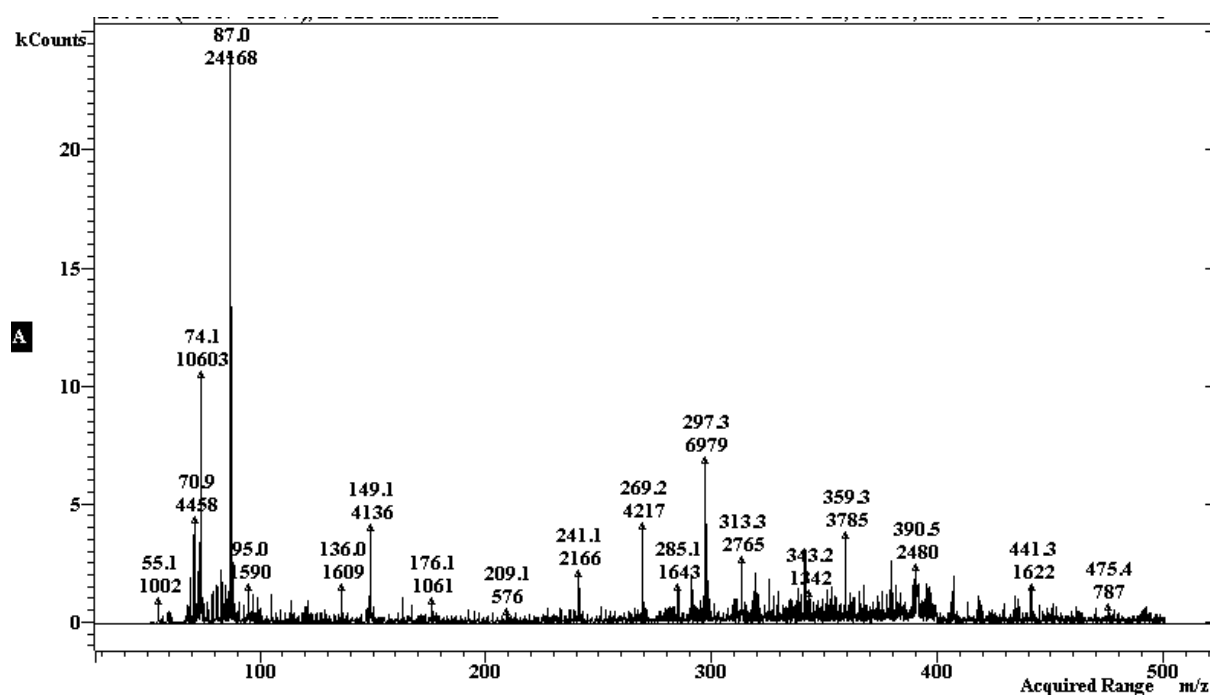

**Figure S5.** Mass spectrum (MS) of the by-products generated during the degradation of Ethyl Violet by the system (AC-ZnO/UV) at different times.
