# Supplementary material for: Impregnation of ZnO onto a Vegetal Activated Carbon from Algerian Olive Waste: A Sustainable Photocatalyst for Degradation of Ethyl Violet Dye
Source: Hindawi journal article supplement (doi:10.1155/2019/4714107), 2019-02-25
Supplement: f2 [file 4714107.f2.docx]

**
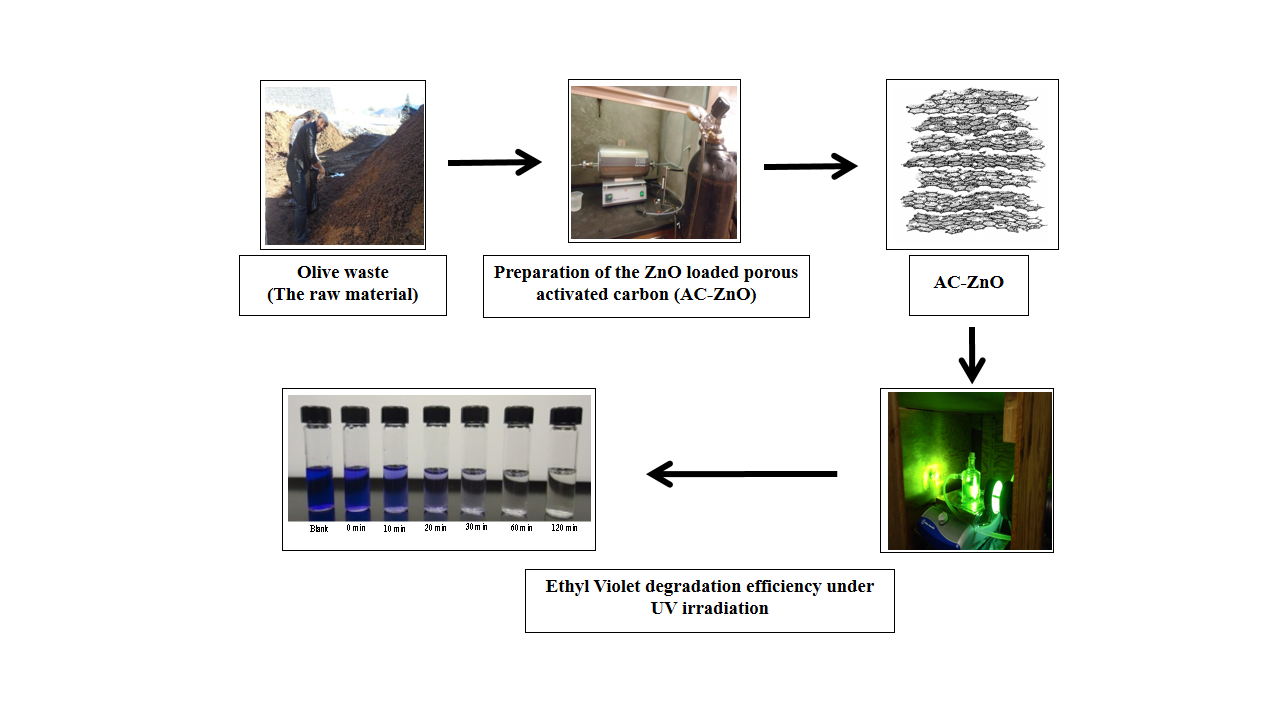
Graphical Abstract description**

The first two pictures of the graphical abstract explains how the oil waste was collected from the site and the activated charcoal preparation process. Then the scheme illustrates the ZnO loaded activated carbon; the next photograph taken during the degradation process indicates the irradiation source and the photoreactor set-up. The final photograph illustrates the dye solution withdrawn in different time intervals. Disappearance of the colour indicates the degradation of dye material.
